# Supplementary material for: Reversible immortalisation enables genetic correction of human muscle progenitors and engineering of next‐generation human artificial chromosomes for Duchenne muscular dystrophy
Source: PubMed Central journal article supplement (PMC5801502; doi:10.15252/emmm.201607284), 2017-12-14
Supplement: EMMM-10-254-s002.pdf [file EMMM-10-254-s002.pdf]

## Expanded View Figures

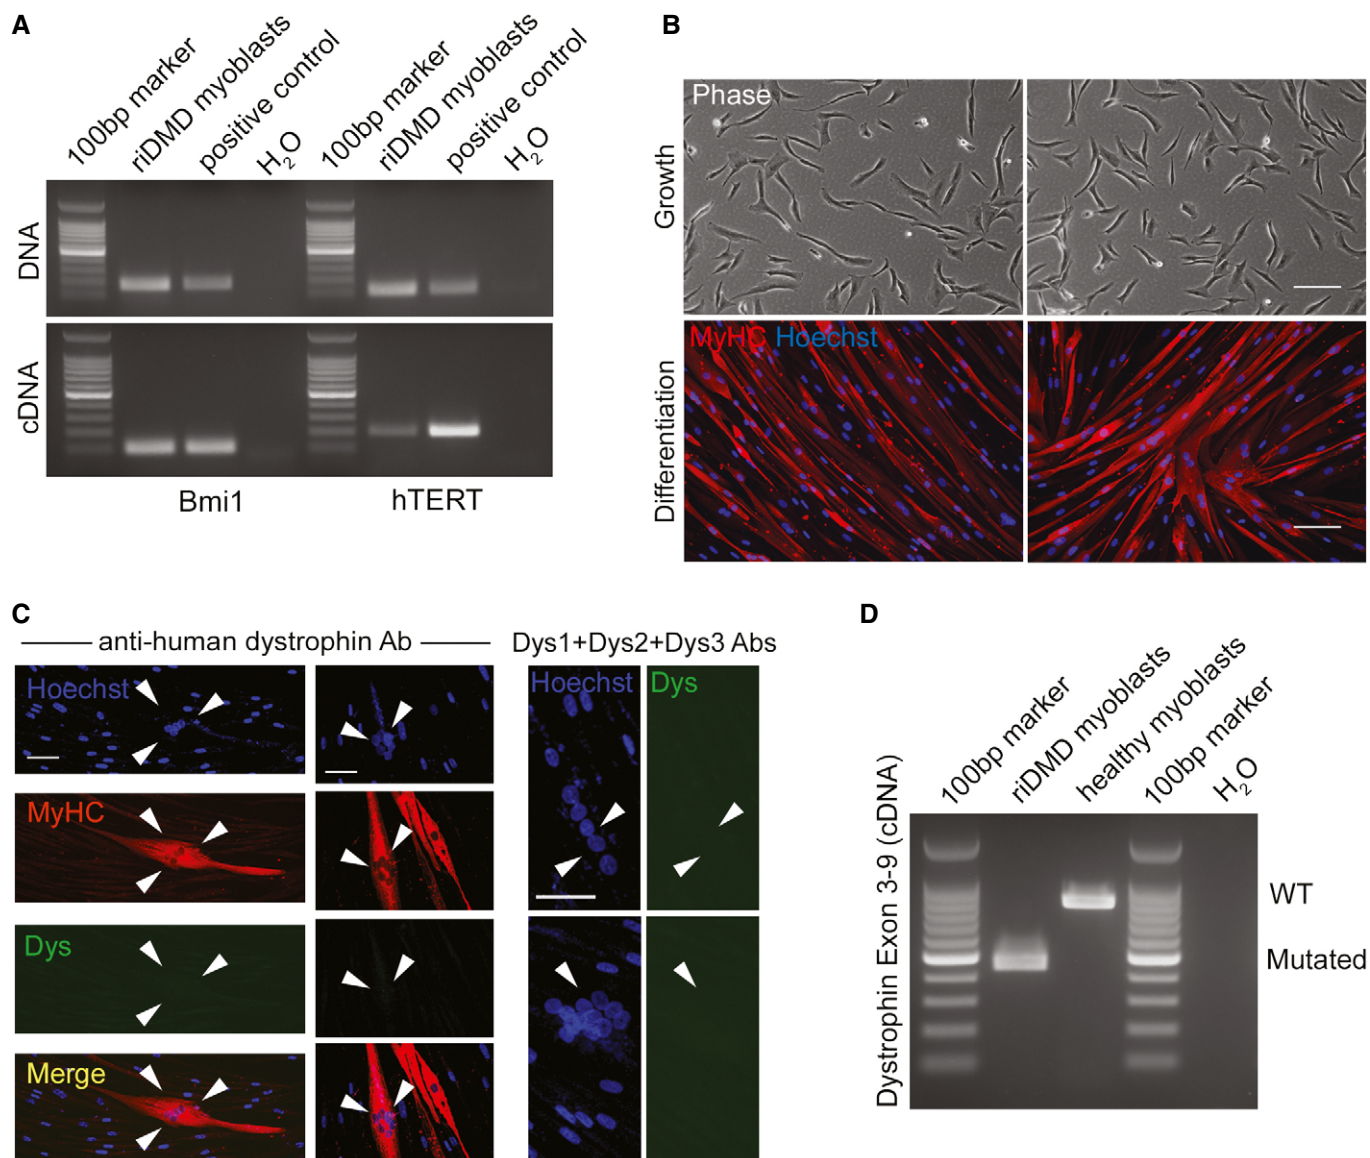

**Figure EV1. Characterisation of DMD immortalised (riDMD) myoblasts.**

A PCRs for hTERT and Bmi1 on genomic DNA and cDNA of reversibly immortalised myoblasts (riDMD myoblasts). Positive control: immortalised mesoangioblasts.  
 B riDMD myoblasts in proliferation (phase contrast, upper images) and after myogenic differentiation (lower images). Red: myosin heavy chain (MyHC); blue: Hoechst. Scale bar: 100  $\mu$ m.  
 C Dystrophin immunofluorescence in riDMD myoblasts myotubes (white arrowheads). Red: MyHC; green: dystrophin; blue: Hoechst; yellow: merge. Scale bar: 50  $\mu$ m.  
 D RT-PCR for dystrophin exon 3–9 transcript in differentiated riDMD myoblasts (deletion exons 5–7) confirming the presence of an out-of-frame DMD mutation and absence of alternative splicing variants (i.e. skipping of exon 8), which could potentially restore the reading frame. Healthy myoblasts: positive control. riDMD myoblast band is approximately 450 bp due to amplification of dystrophin exons 3, 4, 8 and 9, whereas healthy myoblast band is expected to be 833 bp due to amplification of exons 3, 4, 5, 6, 7, 8 and 9.

Source data are available online for this figure.

**Figure EV2. Characterisation of immortalised mesoangioblasts.**

- A Phase contrast (upper row) and fluorescence (lower row) of GFP H#1 and H#2 polyclonal populations and of GFP #B5 clone (from GFP H#3 polyclonal population). Scale bar: 100  $\mu\text{m}$ .
- B Western blot showing Bmi1 expression for hTERT + Bmi1 polyclonal populations (hTERT + Bmi1 H#1 and hTERT + Bmi1 H#2) and untransduced parental population (H#1 and H#2). Gapdh: normaliser.
- C Population doubling curves ( $\text{PD} = \log N / \log 2$ ;  $N$  = number of initially plated cells/number of collected cells) of untransduced and hTERT + Bmi1 mesoangioblasts derived from healthy donor #1 (H#1) and #2 (H#2). Data expressed as means  $\pm$  SEM ( $n = 2$ ). \*\*\* $P = 0.0001$  (H#1), \*\*\* $P = 0.0007$  (H#2), unpaired two-tailed  $t$ -test performed on last time point.
- D Bar graph showing proliferation rate of untransduced (on the left of the dashed line) and hTERT + Bmi1 (on the right of the dashed line) mesoangioblasts derived, respectively, from healthy donor #1 (H#1) and healthy donor #2 (H#2). Proliferation rate was assessed as the percentage BrdU<sup>+</sup> cells on total number of nuclei. Data are expressed as means  $\pm$  SEM ( $n = 2$ ).
- E Quantification of TRF assay shown in Fig 3i. Data expressed as means  $\pm$  SD ( $n = 3$ ).
- F Immunofluorescence analysis of hTERT + Bmi1 clones H#3A, H#3B and H#3C spontaneous (left) and MyoD-ER-mediated (right) skeletal muscle differentiation. Red: myosin heavy chain (MyHC); blue: Hoechst. Scale bar: 50  $\mu\text{m}$ .

Source data are available online for this figure.

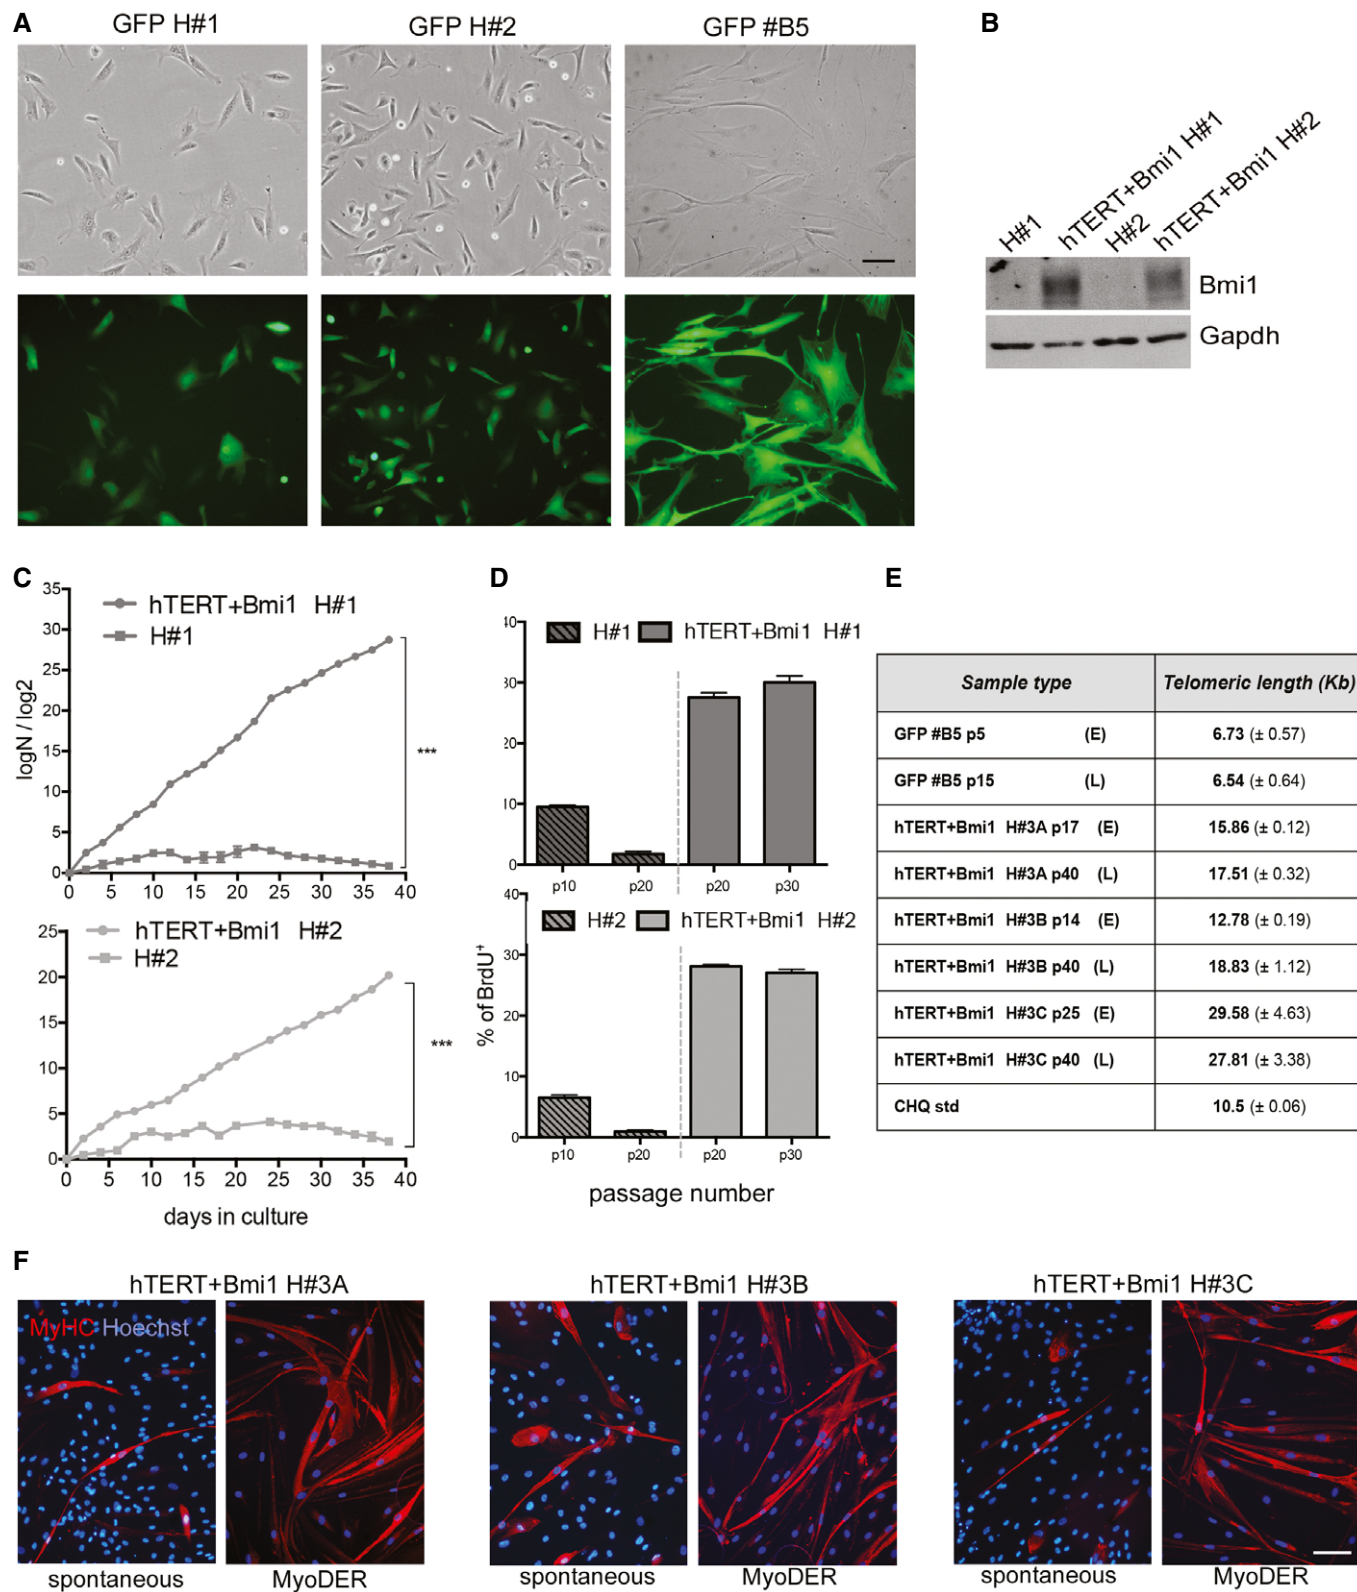

Figure EV2.



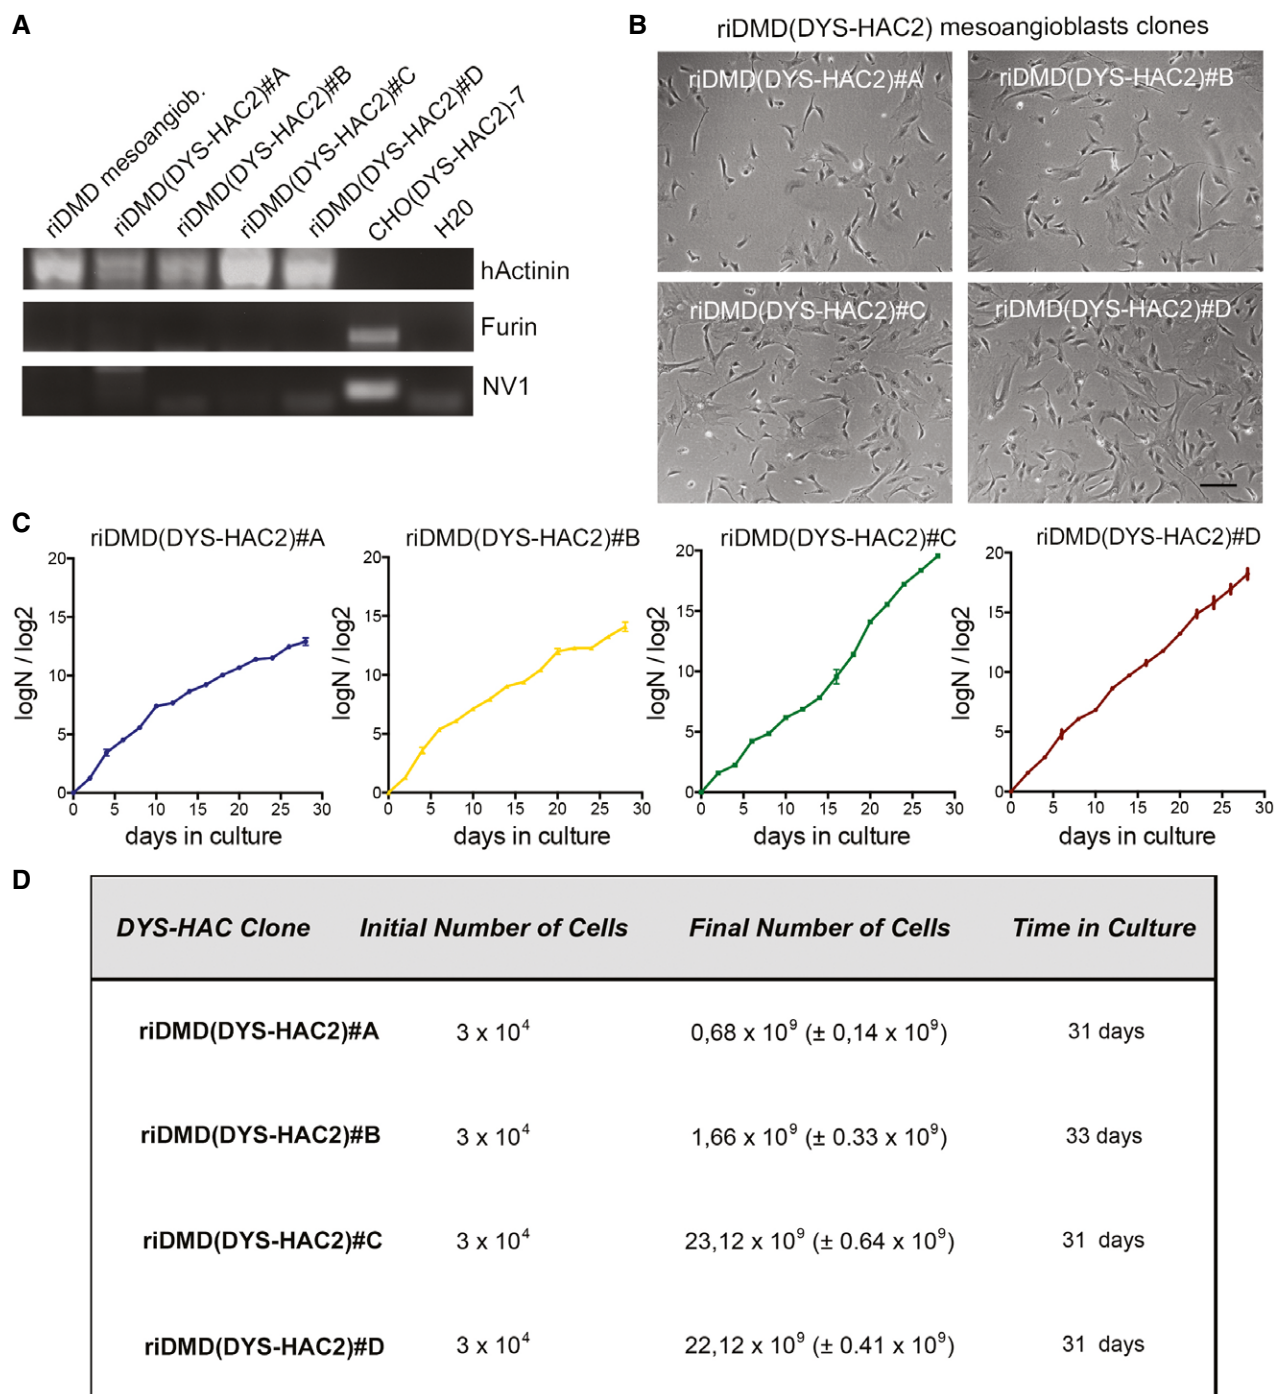

**Figure EV3. Characterisation of riDMD(DYS-HAC2) mesoangioblast clones.**

A PCRs for human actinin, hamster furin and hamster NC1 genes on riDMD(DYS-HAC2) mesoangioblasts clones.

B Phase contrast morphology of riDMD(DYS-HAC2) mesoangioblasts clones riDMD(DYS-HAC2)#A, riDMD(DYS-HAC2)#B, riDMD(DYS-HAC2)#C and riDMD(DYS-HAC2)#D. Scale bar: 100  $\mu$ m.

C Proliferation curves of riDMD(DYS-HAC) mesoangioblast clones (PD =  $\log N / \log 2$ ;  $N$  = number of initially plated cells/number of collected cells). Data are expressed as means  $\pm$  SEM ( $n = 2$ ).

D Numbers of cells obtained in 31 days of culture for riDMD(DYS-HAC2) mesoangioblast clones starting from  $3 \times 10^4$  plated cells. Data are expressed as means  $\pm$  SEM ( $n = 2$ ).

Source data are available online for this figure.
