# Supplementary material for: Reversible immortalisation enables genetic correction of human muscle progenitors and engineering of next‐generation human artificial chromosomes for Duchenne muscular dystrophy
Source: PubMed Central journal article supplement (PMC5801502; doi:10.15252/emmm.201607284), 2017-12-14
Supplement: EMMM-10-254-s003.pdf [file EMMM-10-254-s003.pdf]

**Table EV1.** Tumorigenic assays.

|                              | <i>Sample name</i>                 | <i>No. of mice injected</i> | <i>Tumours</i> | <i>Outcome</i> |
|------------------------------|------------------------------------|-----------------------------|----------------|----------------|
| Immortalised mesoangioblasts | hTERT+Bmi1 H#1 (polyclonal)        | 4                           | None           | 0 out of 4     |
|                              | hTERT+Bmi1 H#2 (polyclonal)        | 4                           | None           | 0 out of 4     |
|                              | hTERT+Bmi1 H#3A (clone)            | 4                           | None           | 0 out of 4     |
|                              | hTERT+Bmi1 H#3B (clone)            | 4                           | None           | 0 out of 4     |
|                              | hTERT+Bmi1 H#3C (clone)            | 4                           | None           | 0 out of 4     |
| riDMD mesoangioblasts        | riDMD mesoangioblasts (polyclonal) | 3                           | None           | 0 out of 3     |
|                              | riDMD(DYS-HAC2)#A (clone)          | 6                           | None           | 0 out of 6     |
|                              | riDMD(DYS-HAC2)#B (clone)          | 6                           | None           | 0 out of 6     |
|                              | riDMD(DYS-HAC2)#C (clone)          | 8                           | None           | 0 out of 8     |
|                              | riDMD(DYS-HAC2)#D (clone)          | 7                           | None           | 0 out of 7     |
| riDMD myoblasts              | riDMD myoblasts (polyclonal)       | 3                           | None           | 0 out of 3     |
|                              | riDMD(DYS-HAC2)# $\alpha$ (clone)  | 5                           | None           | 0 out of 5     |
|                              | riDMD(DYS-HAC2)# $\gamma$ (clone)  | 5                           | None           | 0 out of 5     |
|                              | All immortalised cells             | TOT 63                      | None           | 0 out of 63    |
|                              | All DYS-HAC2 cells                 | TOT 37                      | None           | 0 out of 37    |
|                              | Human tumorigenic cells (HeLa)     | 3                           | Yes            | 3 out of 3     |

The table summarises tumorigenic assays performed in this study and divides them in sub-categories: immortalised cell- and DYS-HAC2-corrected cell-injected mice.  $2 \times 10^6$  cells were injected subcutaneously into immunodeficient *scid/beige* mice. Mice were followed up for tumours formation from a minimum of 4 months up to a maximum of 12 months. As a positive control, mice received HeLa cells. In total, 63 mice have been injected with hTERT and Bmi1 immortalised cells and 37 with DYS-HAC2-genetically corrected cells. None of them developed tumours.
