# Supplementary material for: Reversible immortalisation enables genetic correction of human muscle progenitors and engineering of next‐generation human artificial chromosomes for Duchenne muscular dystrophy
Source: PubMed Central journal article supplement (PMC5801502; doi:10.15252/emmm.201607284), 2017-12-14

# Benedetti et al., Figure 7, Panel B

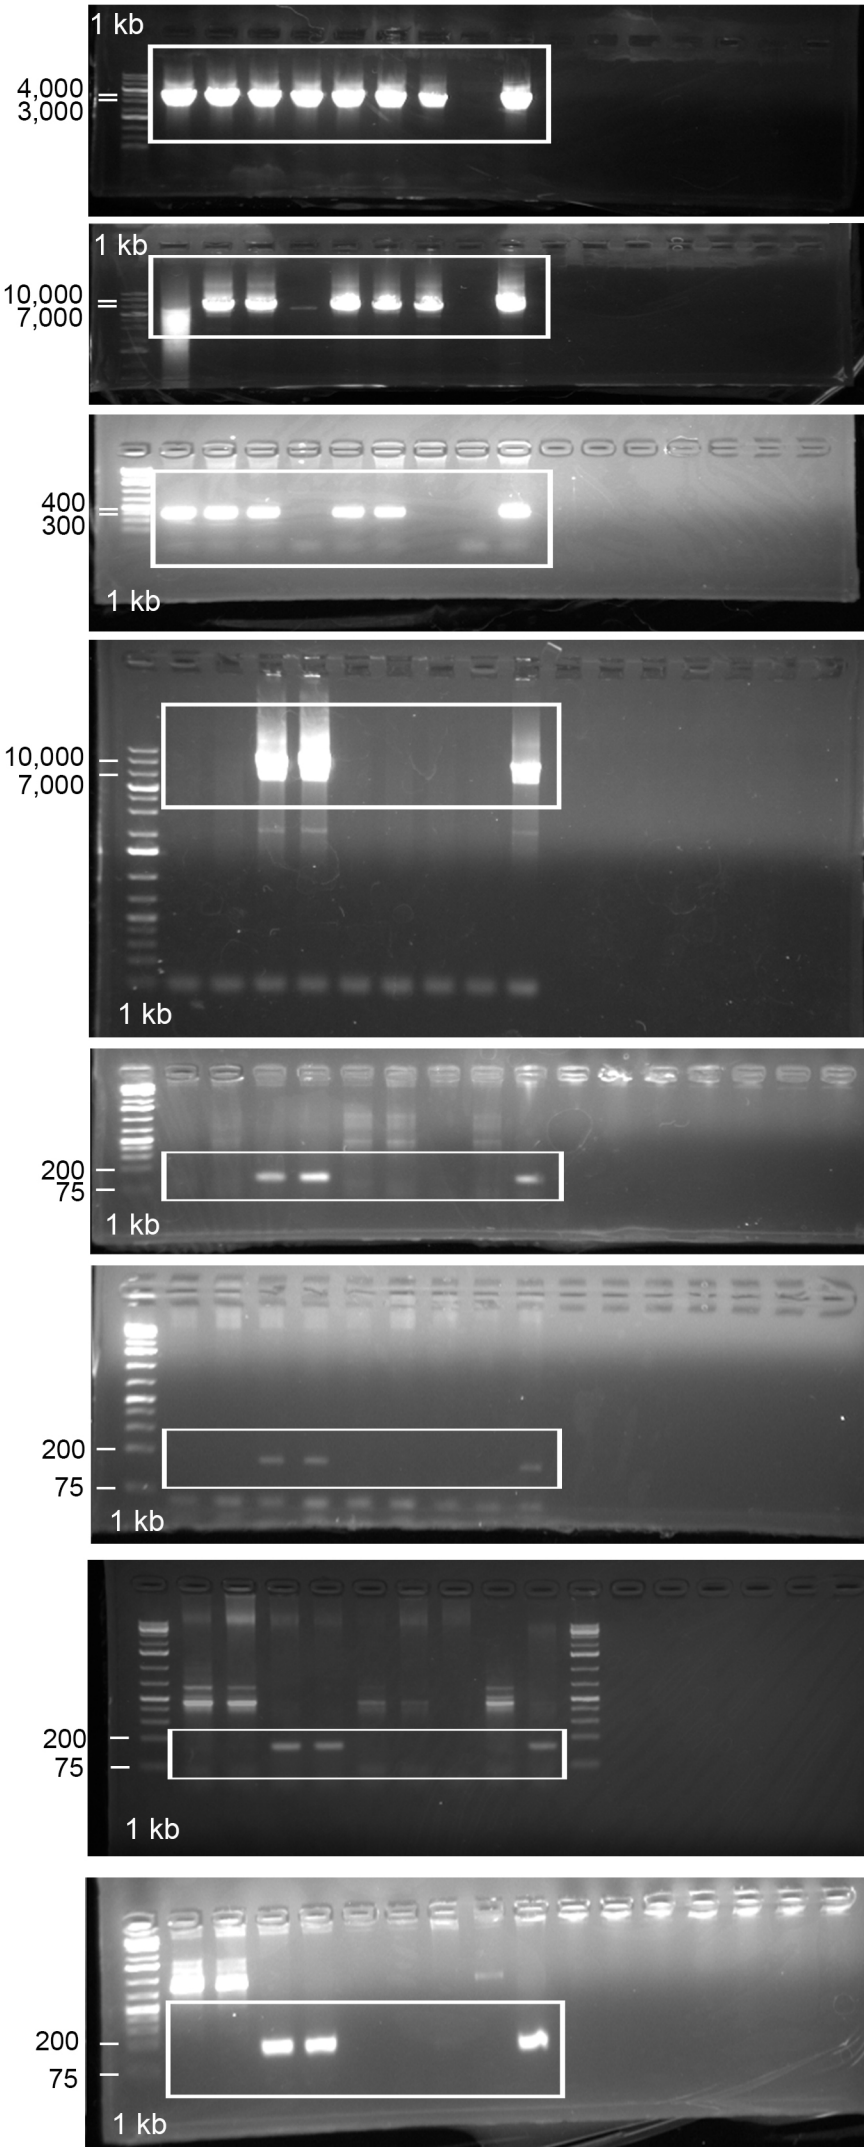

Gene Ruler 1kb Plus  
DNA Ladder

Benedetti et al., Figure 7, Panel C

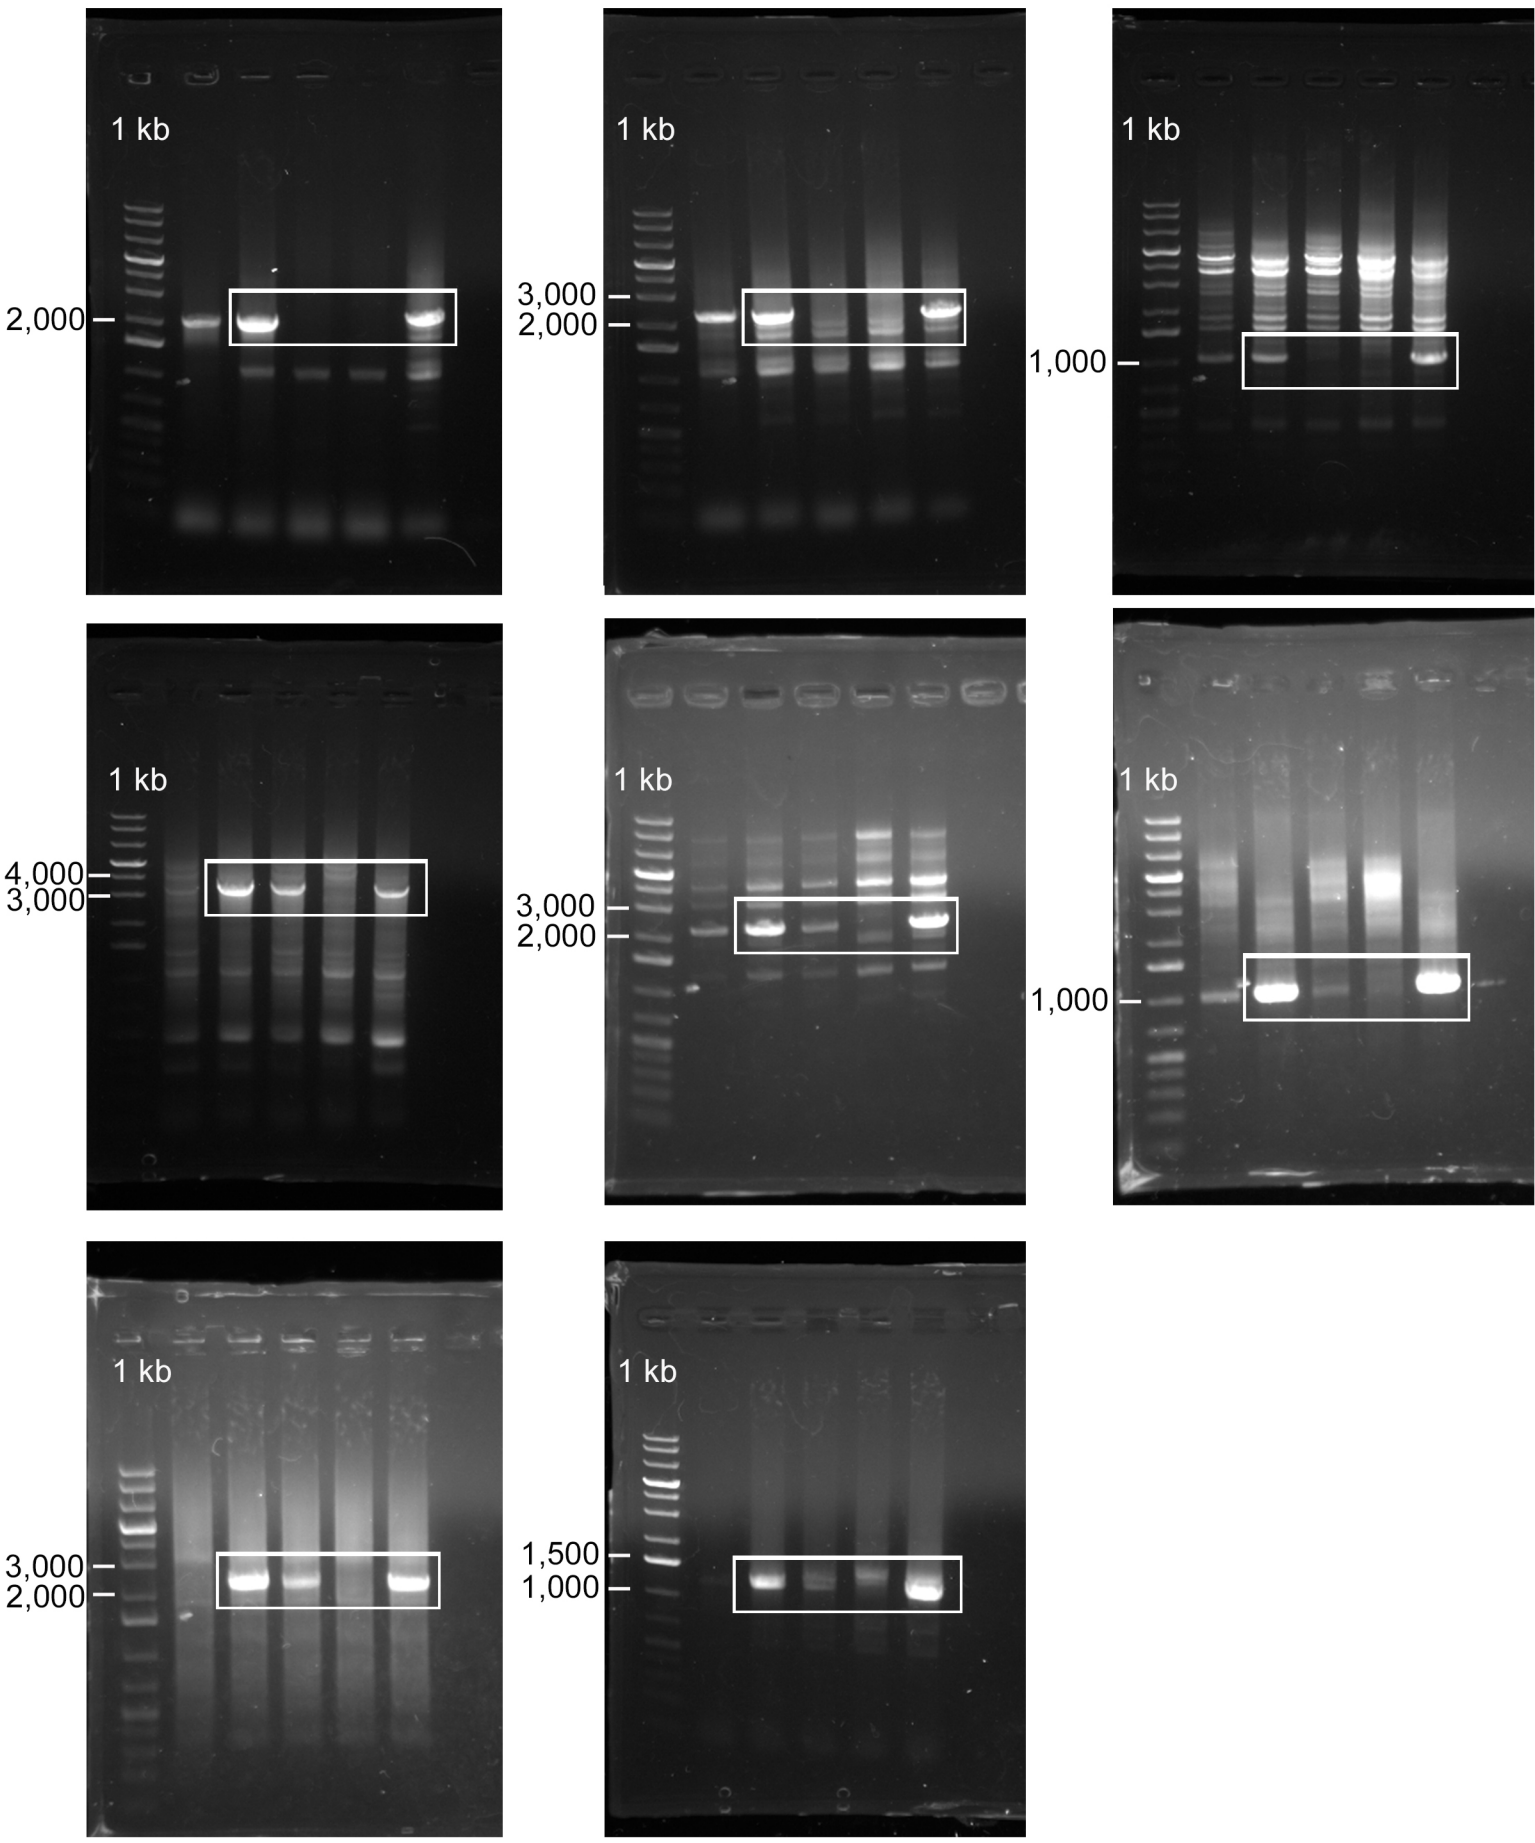

Gene Ruler 1kb Plus DNA Ladder

Benedetti et al., Figure 7, Panel D

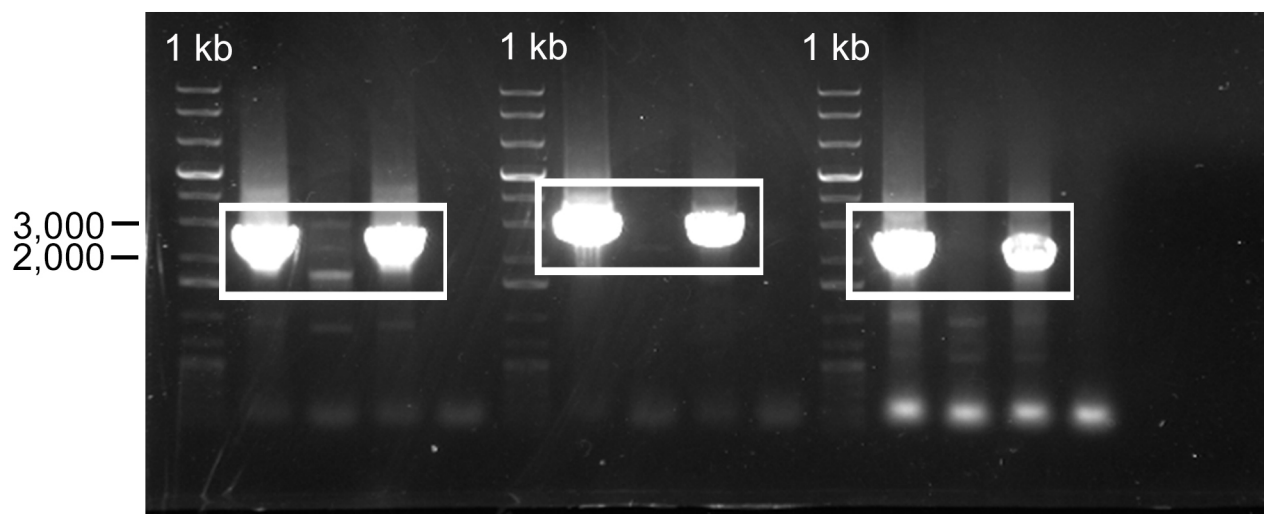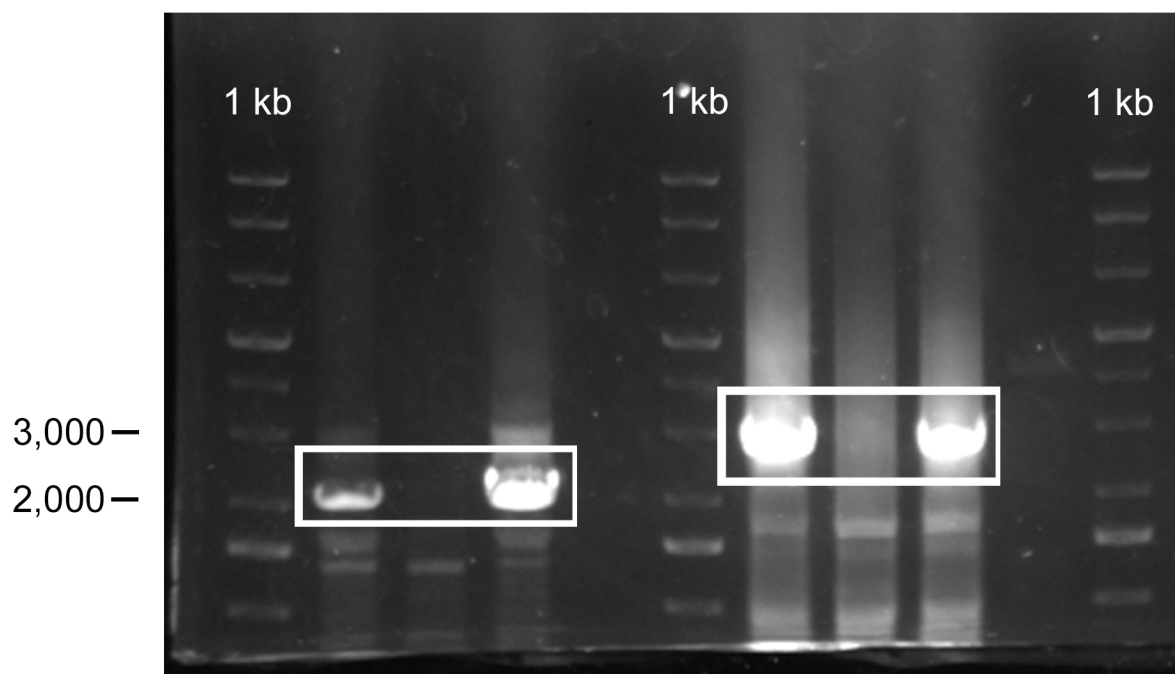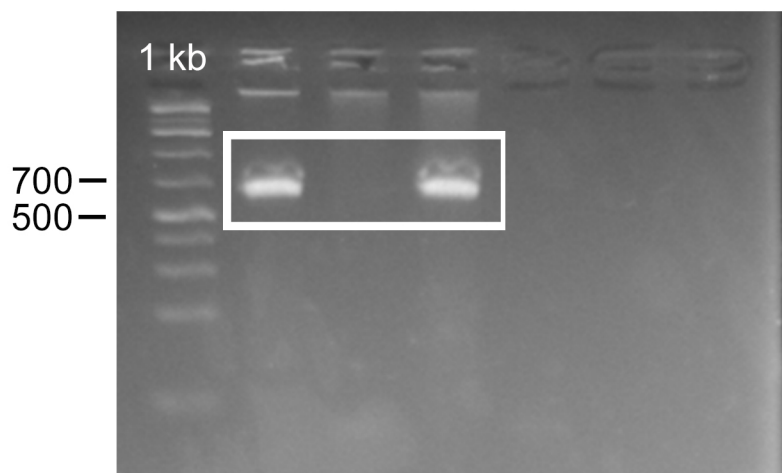

Benedetti et al., Figure 7, Panel F

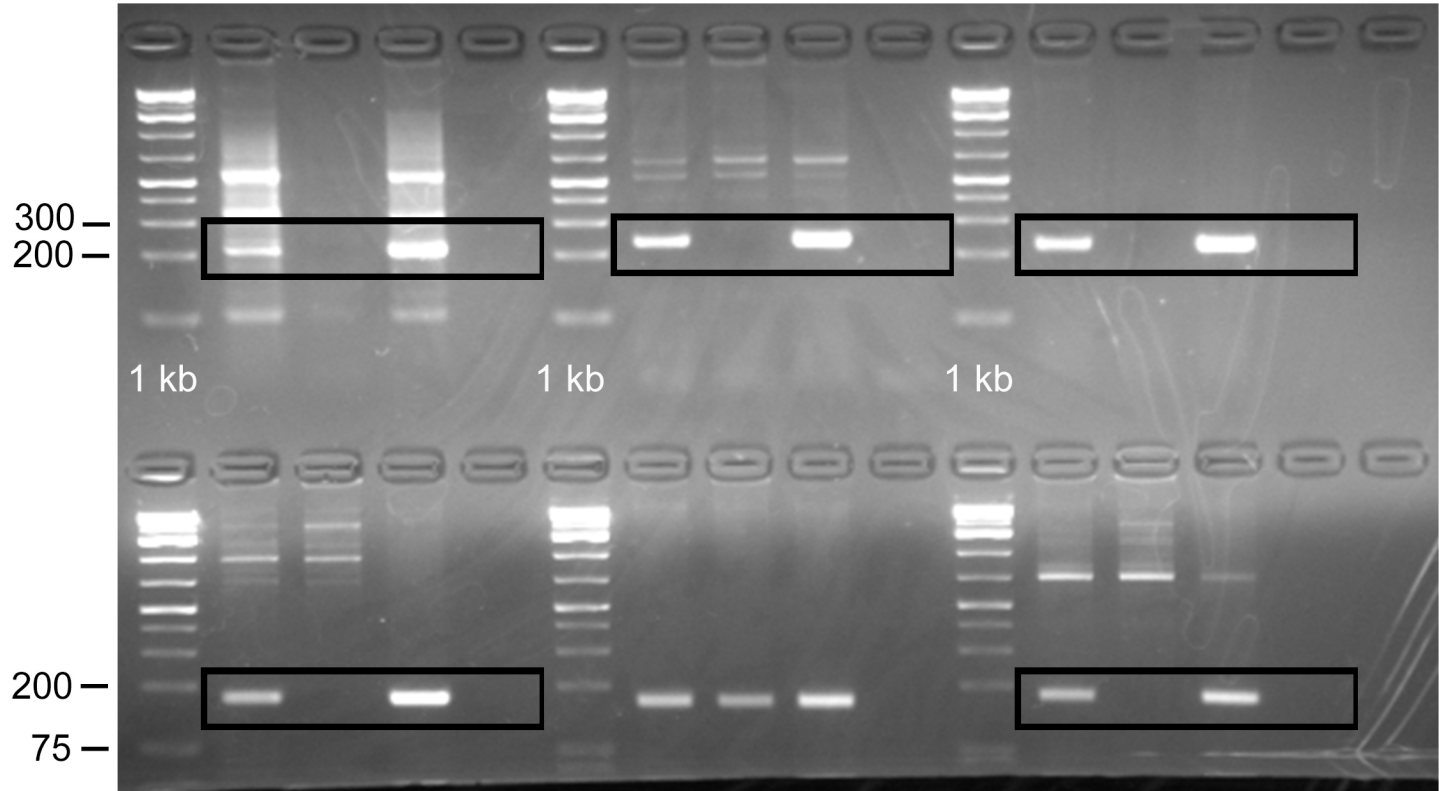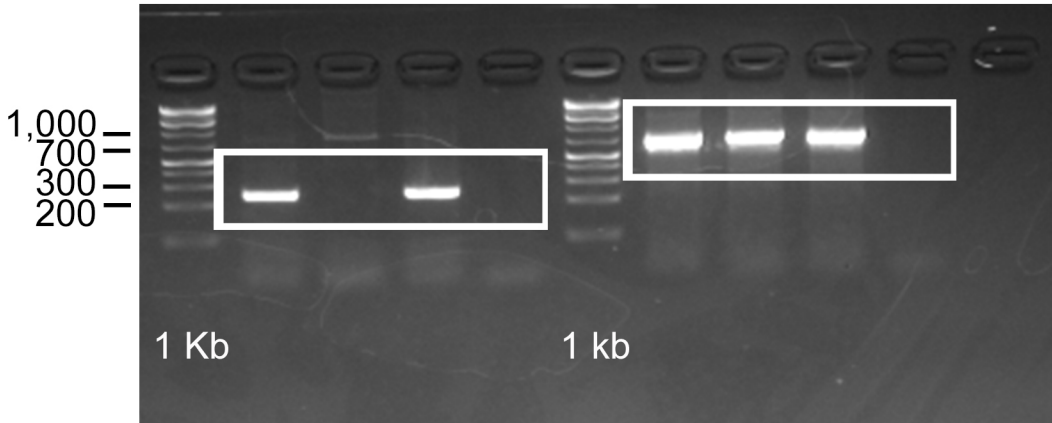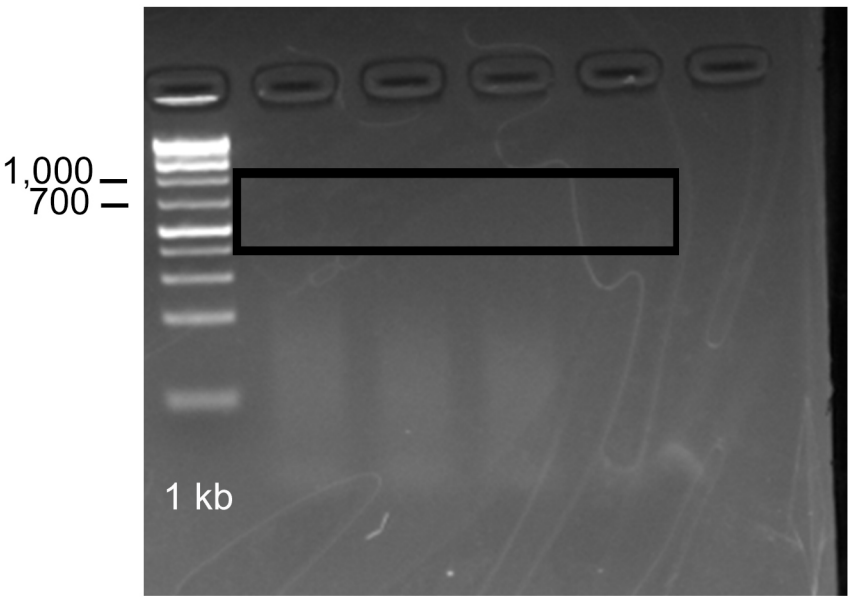

Supplement: EMMM-10-254-s010.pdf [file EMMM-10-254-s010.pdf]
